# Supplementary material
Source: PubMed Central journal article supplement (PMC2464396)
Supplement: supp_23_11_865__1.pdf [file supp_23_11_865__1.pdf]

Patients' experiences of care provided by Emergency Care Practitioners and traditional ambulance practitioners: A survey from London

Supplementary data: Responses to the patient questionnaire, presented by the original response categories and by the bivariate split for each aspect of care, for ECP and EMT/SRPara attended patients, with the p-value of the difference between the two groups.

| Aspect of care                               | Responses                | EMT/SRPara-attended |      | ECP-attended |      | P value of difference |
|----------------------------------------------|--------------------------|---------------------|------|--------------|------|-----------------------|
|                                              |                          | n                   | %    | n            | %    |                       |
| Response time                                | Very dissatisfied        | 8                   | 1.8  | 11           | 2.9  | .771                  |
|                                              | Dissatisfied             | 7                   | 1.5  | 8            | 2.1  |                       |
|                                              | Fair                     | 13                  | 2.9  | 11           | 2.9  |                       |
|                                              | Satisfied                | 137                 | 30.0 | 117          | 30.8 |                       |
|                                              | Very satisfied           | 291                 | 63.8 | 233          | 61.3 |                       |
|                                              | Less than very satisfied | 165                 | 36.2 | 147          | 38.7 |                       |
| Overall care                                 | Very satisfied           | 291                 | 63.8 | 233          | 61.3 | .473                  |
|                                              | Very poor                | 4                   | 0.9  | 6            | 1.5  |                       |
|                                              | Poor                     | 4                   | 0.9  | 9            | 2.3  |                       |
|                                              | Neither                  | 14                  | 3.0  | 7            | 1.8  |                       |
|                                              | Good                     | 75                  | 16.1 | 61           | 15.4 |                       |
|                                              | Very good                | 369                 | 79.2 | 314          | 79.1 |                       |
| Suitability of treatment and advice          | Less than very good      | 97                  | 20.8 | 83           | 20.9 | 1.000                 |
|                                              | Very good                | 369                 | 79.2 | 314          | 79.1 |                       |
|                                              | Not suitable at all      | 7                   | 1.6  | 7            | 1.8  |                       |
|                                              | Partly suitable          | 41                  | 9.4  | 38           | 10.0 |                       |
|                                              | Fully suitable           | 386                 | 88.9 | 334          | 88.1 |                       |
|                                              | Less than fully suitable | 48                  | 11.1 | 45           | 11.9 |                       |
| Friendliness and courtesy of ambulance staff | Fully suitable           | 386                 | 88.9 | 334          | 88.1 | .741                  |
|                                              | Very poor                | 6                   | 1.3  | 12           | 3.1  |                       |
|                                              | Poor                     | 5                   | 1.1  | 3            | 0.8  |                       |
|                                              | Neither                  | 14                  | 3.1  | 11           | 2.8  |                       |
|                                              | Good                     | 71                  | 15.7 | 57           | 14.7 |                       |
|                                              | Very good                | 356                 | 78.8 | 306          | 78.7 |                       |
| Showed concern about patient                 | Less than very good      | 96                  | 21.2 | 83           | 21.3 | 1.000                 |
|                                              | Very good                | 356                 | 78.8 | 306          | 78.7 |                       |
|                                              | Very poor                | 7                   | 1.5  | 12           | 3.1  |                       |
|                                              | Poor                     | 5                   | 1.1  | 4            | 1.0  |                       |
|                                              | Neither                  | 15                  | 3.3  | 17           | 4.5  |                       |
|                                              | Good                     | 87                  | 19.2 | 70           | 18.4 |                       |
| Listening                                    | Very good                | 338                 | 74.8 | 278          | 73.0 | .524                  |
|                                              | Less than very good      | 114                 | 25.2 | 103          | 27.0 |                       |
|                                              | Very good                | 338                 | 74.8 | 278          | 73.0 |                       |
|                                              | Very poor                | 7                   | 1.6  | 12           | 3.2  |                       |
|                                              | Poor                     | 1                   | 0.2  | 6            | 1.6  |                       |
|                                              | Neither                  | 19                  | 4.3  | 18           | 4.7  |                       |
| Listening                                    | Good                     | 91                  | 20.5 | 77           | 20.3 | .351                  |
|                                              | Very good                | 325                 | 73.4 | 267          | 70.3 |                       |
|                                              | Less than very good      | 118                 | 26.6 | 13           | 29.7 |                       |
|                                              | Very good                | 325                 | 73.4 | 267          | 70.3 |                       |

| Aspect of care                     | Responses                | EMT/SRPara-attended |      | ECP-attended |      | P value of difference |       |
|------------------------------------|--------------------------|---------------------|------|--------------|------|-----------------------|-------|
|                                    |                          | n                   | %    | n            | %    |                       |       |
| Answering questions                | Very poor                | 4                   | 1.0  | 12           | 3.3  | .248                  |       |
|                                    | Poor                     | 5                   | 1.3  | 6            | 1.7  |                       |       |
|                                    | Neither                  | 14                  | 3.5  | 14           | 3.9  |                       |       |
|                                    | Good                     | 96                  | 24.1 | 83           | 23.1 |                       |       |
|                                    | Very good                | 280                 | 70.2 | 244          | 68.0 |                       |       |
|                                    | Less than very good      | 119                 | 29.8 | 115          | 32.0 |                       | .529  |
| Very good                          | 280                      | 70.2                | 244  | 68.0         |      |                       |       |
| Quality of examinations            | Very poor                | 4                   | 1.0  | 14           | 3.9  | .104                  |       |
|                                    | Poor                     | 6                   | 1.5  | 7            | 1.9  |                       |       |
|                                    | Neither                  | 23                  | 5.7  | 18           | 5.0  |                       |       |
|                                    | Good                     | 95                  | 23.5 | 76           | 21.0 |                       |       |
|                                    | Very good                | 276                 | 68.3 | 247          | 68.2 |                       |       |
|                                    | Less than very good      | 128                 | 31.7 | 115          | 31.8 |                       | 1.000 |
| Very good                          | 276                      | 68.3                | 247  | 68.2         |      |                       |       |
| Explaining condition               | Very poor                | 7                   | 1.9  | 13           | 3.8  | .361                  |       |
|                                    | Poor                     | 9                   | 2.5  | 9            | 2.6  |                       |       |
|                                    | Neither                  | 22                  | 6.0  | 26           | 7.0  |                       |       |
|                                    | Good                     | 94                  | 25.7 | 73           | 21.3 |                       |       |
|                                    | Very good                | 234                 | 63.9 | 222          | 64.7 |                       |       |
|                                    | Less than very good      | 132                 | 35.3 | 121          | 35.3 |                       | .875  |
| Very good                          | 234                      | 63.9                | 222  | 64.7         |      |                       |       |
| Thoroughness of assessment         | Not at all thorough      | 14                  | 3.4  | 14           | 3.9  | .028                  |       |
|                                    | Quite thorough           | 168                 | 40.8 | 113          | 31.5 |                       |       |
|                                    | Very thorough            | 230                 | 55.8 | 232          | 64.6 |                       |       |
|                                    | Less than very thorough  | 182                 | 44.2 | 127          | 35.4 |                       | .015  |
|                                    | Very thorough            | 230                 | 55.8 | 232          | 64.6 |                       |       |
| Explained what was going to happen | Strongly disagree        | 7                   | 1.8  | 11           | 3.2  | .035                  |       |
|                                    | Disagree                 | 14                  | 3.6  | 8            | 2.3  |                       |       |
|                                    | Neither                  | 16                  | 4.2  | 17           | 4.9  |                       |       |
|                                    | Agree                    | 212                 | 55.2 | 156          | 45.1 |                       |       |
|                                    | Strongly agree           | 135                 | 35.2 | 154          | 44.5 |                       |       |
|                                    | Less than strongly agree | 249                 | 64.8 | 192          | 55.5 |                       | .010  |
|                                    | Strongly agree           | 135                 | 35.2 | 154          | 44.5 |                       |       |
| Passed on relevant information     | Strongly disagree        | 7                   | 1.8  | 14           | 4.0  | .058                  |       |
|                                    | Disagree                 | 11                  | 2.9  | 5            | 1.4  |                       |       |
|                                    | Neither                  | 19                  | 4.9  | 12           | 3.5  |                       |       |
|                                    | Agree                    | 201                 | 52.3 | 160          | 46.2 |                       |       |
|                                    | Strongly agree           | 146                 | 38.0 | 155          | 44.8 |                       |       |
|                                    | Less than strongly agree | 238                 | 62.0 | 191          | 55.2 |                       | .071  |
|                                    | Strongly agree           | 146                 | 38.0 | 155          | 44.8 |                       |       |
| Felt comfortable with the decision | Strongly disagree        | 8                   | 2.0  | 14           | 3.9  | .231                  |       |
|                                    | Disagree                 | 9                   | 2.2  | 10           | 2.8  |                       |       |
|                                    | Neither                  | 15                  | 3.7  | 13           | 3.7  |                       |       |
|                                    | Agree                    | 209                 | 51.5 | 158          | 44.5 |                       |       |
|                                    | Strongly agree           | 165                 | 40.6 | 160          | 45.1 |                       |       |
|                                    | Less than strongly agree | 241                 | 59.4 | 195          | 54.9 |                       | .240  |
|                                    | Strongly agree           | 165                 | 40.6 | 160          | 45.1 |                       |       |
